# Supplementary material for: Strategies for successful trauma registry implementation in low- and middle-income countries—protocol for a systematic review
Source: Springer Nature journal article supplement (doi:10.1186/s13643-018-0700-2), 2018-02-21
Supplement: MOESM1 [file 15481274]

## Additional File 1. Search Strategy

|                 |                                                   |
|-----------------|---------------------------------------------------|
| <b>Date:</b>    | <i>2017-02-23</i>                                 |
| <b>From:</b>    | <i>Tara Landry (MUHC - MGH library; 43057)</i>    |
| <b>To:</b>      | <i>Étienne St-Louis</i>                           |
| <b>Subject:</b> | <i>Trauma registries in LIC or LMIC countries</i> |

|                                                   |    |
|---------------------------------------------------|----|
| 1. Methodology.....                               | 2  |
| 2. Searches.....                                  | 3  |
| 2.1. Ovid Medline.....                            | 3  |
| 2.2. PubMed Medline .....                         | 6  |
| 2.3. Ovid Embase .....                            | 11 |
| 2.4. Africa-Wide Information.....                 | 14 |
| 2.5. Biosis Previews.....                         | 17 |
| 2.6. The Cochrane Library .....                   | 19 |
| 2.7. Global Health .....                          | 20 |
| 2.8. LILACS.....                                  | 22 |
| 2.9. ProQuest Dissertations & Theses Global ..... | 22 |
| 2.10. Scopus .....                                | 23 |
| 2.11. Web of Science.....                         | 25 |

# 1. Methodology

The following databases were searched for relevant studies: MEDLINE (via Ovid, 1946 to 20/Feb/2017; via PubMed, 1946 to 20/Feb/2017); Embase (via Ovid, 1947 to 20/Feb/2017); Biosis Previews (via Ovid, 1969 to 2017 Week 12); Global Health (via Ovid, 1973 to 2017 Week 06); Africa-Wide Information (via Ebsco); the Database of Abstracts of Reviews of Effects (via The Cochrane Library, to issue 2 of 4 April 2015); the CENTRAL Registry of Controlled Trials (via The Cochrane Library, to issue 1 of 12, January 2017); The Cochrane Methodology Register (via The Cochrane Library, to issue 3 of 4, July 2012); the NHS Economic Evaluation Database (to issue 2 of 4, April 2015); LILACS (via Bireme); ProQuest Dissertations & Theses Global (via ProQuest); Scopus (via Elsevier) and Web of Science (via ThomsonReuters) were searched for relevant studies. The search strategy used text words and relevant indexing to identify articles discussing trauma registries in low- or low-middle income countries. The full MEDLINE strategy (see below) was applied to all databases, with modifications to search terms as necessary.

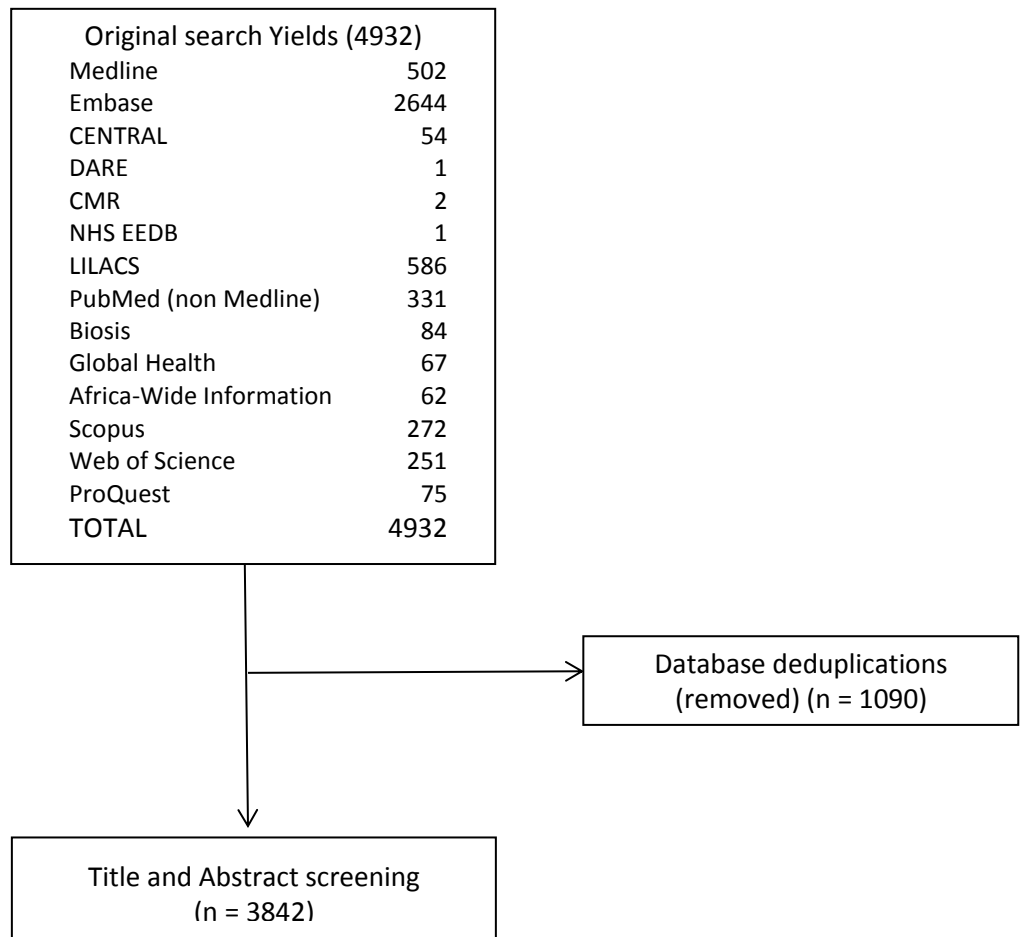

## 2. Searches

### 2.1. Ovid Medline

- 1 Registries/ (67061)
- 2 exp Databases as Topic/ (118214)
- 3 1 or 2 (181949)
- 4 exp "Wounds and Injuries"/ (802499)
- 5 exp Emergency Service, Hospital/ (60550)
- 6 4 or 5 (849674)
- 7 3 and 6 (8410)
- 8 (trauma adj2 (database\* or data-base\* or regist\*)).tw,kf. (3704)
- 9 7 or 8 (10703)
- 10 Afghanistan/ or afghanistan.tw,kf,ia. (5527)
- 11 exp Africa, Eastern/ or (East\* Africa or Burundi or Djibouti or Somaliland or Eritrea or Ethiopia or Abyssinia or Kenya or Rwanda or Ruanda or Somalia or Sudan or Tanzania or Tanganyika or Zanzibar or Urundi or Uganda or (Somali\* adj1 (democratic or republic))).tw,kf,ia. (67640)
- 12 exp Africa, Western/ or (West\*-Africa or Benin or Dahomey or Burkina Faso or Upper Volta or Cape verde or Cabo Verde or cap-vert or cote d'ivoire or ivory coast or Cote dilvoire or Gambia or Ghana or Gold Coast or Guinea or Liberia or Mali or Mauritania or Mauretania or Niger or Nigeria or Senegal or Senegambia or Sierra Leone or Togo or Togolese or Togoland or (sudan\* adj1 republic)).tw,kf,ia. (182973)
- 13 Armenia/ or armenia\*.tw,kf,ia. (2293)
- 14 Bangladesh/ or (Bangladesh or East-bengal).tw,kf,ia. (11687)
- 15 Bhutan/ or Bhutan.tw,kf,ia. (504)
- 16 Bolivia/ or boliv\*.tw,kf,ia. (4218)
- 17 Cambodia/ or (cambodia or Kampuchea\* or Khmer or kampudja).tw,kf,ia. (3861)
- 18 Cameroon/ or (cameroun or cameroon).tw,kf,ia. (6325)
- 19 Central African Republic/ or ("ubangi-shari" or Centrafrique or ((central-africa\* or centrafrican or central african) adj2 (republic or empire))).tw,kf,ia. (1051)
- 20 Chad/ or (chad or tchad or tshad).tw,kf,ia. (1120)
- 21 Comoros/ or (comoros or comores or comoro or mayotte).tw,kf,ia. (517)
- 22 Congo/ or Democratic Republic of the Congo/ or (katanga or zaire or congo or leopoldville).tw,kf,ia. (12600)
- 23 Egypt/ or (egypt or "united arab republic").tw,kf,ia. (17517)
- 24 El Salvador/ or salvador.tw,kf,ia. (2871)
- 25 Guatemala/ or Guatemala.tw,kf,ia. (3706)
- 26 Haiti/ or (haiti or hispaniola).tw,kf,ia. (3590)
- 27 Honduras/ or honduras.tw,kf,ia. (1605)
- 28 exp India/ or (india or Sikkim).tw,kf,ia. (119303)
- 29 Indonesia/ or (indonesia\* or Celebes or East Indies or Irian Jaya or Java or Madoera or Madura or Malay Archipelago or "Netherlands East Indies" or New Guinea West or Sulawesi or Sumatra or Timor or West Irian).tw,kf,ia. (16591)
- 30 Kashmir.tw,kf,ia. (1137)
- 31 (kiribati or nauru or tuvalu).tw,kf,ia. (272)
- 32 "Democratic People's Republic of Korea"/ or (North\* Korea or (Korea adj5 demo\*)).tw,kf,ia. (558)
- 33 Kosovo/ or kosovo.tw,kf,ia. (747)

- 34 Kyrgyzstan/ or (Kirghiz\* or Kirgiz\* or Kyrgyz\*).tw,kf,ia. (1522)
- 35 Laos/ or (laos or lao pdr (lao and democratic republic)).tw,kf,ia. (2422)
- 36 Lesotho/ or (lesotho or Basutoland).tw,kf,ia. (587)
- 37 Madagascar/ or (madagascar or malagasy).tw,kf,ia. (4535)
- 38 Malawi/ or (malawi or nyasaland).tw,kf,ia. (5697)
- 39 Micronesia/ or micronesia\*.tw,kf,ia. (1549)
- 40 Moldova/ or (moldova\* or Moldavia\*).tw,kf,ia. (1029)
- 41 Mongolia/ or mongolia\*.tw,kf,ia. (7477)
- 42 Morocco/ or (morocco or ifni).tw,kf,ia. (6317)
- 43 Mozambique/ or (mozambique or Mocambique or mozambic).tw,kf,ia. (2973)
- 44 Myanmar/ or (myanmar or burma).tw,kf,ia. (3056)
- 45 Nepal/ or Nepal.tw,kf,ia. (8419)
- 46 Nicaragua/ or nicaragua.tw,kf,ia. (1819)
- 47 Pakistan/ or Pakistan.tw,kf,ia. (18296)
- 48 Papua New Guinea/ or Papua.tw,kf,ia. (5266)
- 49 Philippines/ or (Philippines or Philipines or Phillipines or Phillippines or Mindanao or Luzon or Visayas).tw,kf,ia. (10194)
- 50 exp Samoa/ or samoa\*.tw,kf,ia. (1216)
- 51 Sao Tome.tw,kf,ia. (203)
- 52 ((Caroline or Ellice or Gilbert or Johnston or Mariana or Marshall or Pacific or Solomon) adj1 (Island or islands)).tw,kf,ia. (3032)
- 53 Sri Lanka/ or (ceylon or sri lanka).tw,kf,ia. (6823)
- 54 Swaziland/ or swaziland.tw,kf,in. (804)
- 55 Syria/ or syria\*.tw,kf,ia. (11054)
- 56 Tajikistan/ or (Tajikistan or Tadjik\* or Tadzhi\* or Tajik).tw,kf,ia. (929)
- 57 Timor-Leste/ or (Timor Leste or East Timor or Portuguese-Timor).tw,kf,ia. (379)
- 58 Tonga/ or tonga\*.tw,kf,ia. (620)
- 59 Tunisia/ or (Tunisia or Tunis).tw,kf,ia. (8746)
- 60 Ukraine/ or ukrain\*.tw,kf,ia. (17037)
- 61 Uzbekistan/ or uzbek\*.tw,kf,ia. (2205)
- 62 Vanuatu/ or (vanuatu or new hebrides).tw,kf,ia. (594)
- 63 Vietnam/ or (vietnam or viet-nam).tw,kf,ia. (14909)
- 64 (west bank or gaza or palestin\*).tw,kf,ia. (2713)
- 65 Yemen/ or (yemen\* or aden or sanaa).tw,kf,ia. (2184)
- 66 Yugoslavia/ (9058)
- 67 limit 65 to yr="1994 - 2013" (2109)
- 68 (Yugoslavia or vojvodina).tw,kf,ia. (3073)
- 69 Zambia/ or zambia.tw,kf,ia. (5013)
- 70 Zimbabwe/ or (zimbabwe or rhodesia).tw,kf,ia. (6627)
- 71 10 or 11 or 12 or 13 or 14 or 15 or 16 or 17 or 18 or 19 or 20 or 21 or 22 or 23 or 24 or 25 or 26 or 27 or 28 or 29 or 30 or 31 or 32 or 33 or 34 or 35 or 36 or 37 or 38 or 39 or 40 or 41 or 42 or 43 or 44 or 45 or 46 or 47 or 48 or 49 or 50 or 51 or 52 or 53 or 54 or 55 or 56 or 57 or 58 or 59 or 60 or 61 or 62 or 63 or 64 or 67 or 68 or 69 or 70 (587231)
- 72 (kabul or Porto-Novu or Hogbonou or Adjace or Cotonou or Kutonu or Ouagadougou or Ouaga or Bujumbura or Usumbura or Phnom Penh or Bangui or Bangi or N'Djamena or Ndjamena or Fort Lamy or Moroni or Kinshasa or Asmara or Asmera or Addis Ababa or Addis Abeba or Banjul or Bathurst or Conakry or Bissau or Port-au-Prince or Pyongyang or Monrovia or Antananarivo or

Tananarive or Tana or Lilongwe or Bamako or Maputo or Lourenco Marques or Kathmandu or Niamey or Kigali or Freetown or Free-town or Mogadishu or Xamar or Hamar or Muqdisho or Maqadishu or Juba or Dodoma or Dar es Salaam or Lome or Kampala or Harare or Salisbury or Yerevan or Dhaka or Dacca or Thimphu or Thimbu or Sucre or Charcas or La Plata or Chuquisaca or La Paz or Praia or Yaounde or Jaunde or Brazzaville or Yamoussoukro or Cairo or Accra).tw,kf,ia. (22068)

- 73 (Tegucigalpa or Tegus or New Delhi or Jakarta or Nairobi or South Tarawa or Tarawa Teinainano or Pristina or Prishtina or Bishkek or Pishpek or Frunze or Vientiane or Maseru or Nouakchott or Palikir or Chisinau or Kishinev or Rabat or Nay Pyi Taw or Naypyidaw or Nepranytau or Naypyitaw or Kyatpyay or Pyinmana or Kyatpyay or Pyinmana or Yangon or Rangoon or Managua or Abuja or Lagos or Islamabad or Port Moresby or Moresby or Pom Town or Manila or Apia or Dakar or Honiara or Jayawardenepura or Jayewardenepura or Khartoum or Mbabane or Embabane or Lobamba or Damascus or Dushanbe or Dyushambe or Stalinabad or Dili or Kyiv or Kiev or Tashkent or Toshkent or Port Vila or Hanoi or Ha Noi or Sana'a or Sanaa or Sana or Lusaka or Ulaanbaatar or Ulan-Bator or Nuku-Alofa).tw,kf,ia. (19172)
- 74 72 or 73 (41000)
- 75 Developing Countries/ (68116)
- 76 (LMIC or LMICs or LAMIC or LAMICs or ((deprived\* or underserved or under-served or transitional or poor or underdevel\* or devel\* or low\* or less or least or under or mid\* or third) adj3 (countr\* or nation or econom\*))).tw,kf. (152122)
- 77 75 or 76 (179125)
- 78 71 or 74 or 77 (721130)
- 79 9 and 77 (510)
- 80 remove duplicates from 78 (502)

## 2.2. PubMed Medline

| Search | Query                                                                                                                                                                                                                                                                                                                                                                                                                                                                                                                                                                                                                                                                                                                                                                                                                                                                                                                                                                                                                                                                                                                                                                                                                                                                                                                                                                                                                                                                                                                                                | Items found |
|--------|------------------------------------------------------------------------------------------------------------------------------------------------------------------------------------------------------------------------------------------------------------------------------------------------------------------------------------------------------------------------------------------------------------------------------------------------------------------------------------------------------------------------------------------------------------------------------------------------------------------------------------------------------------------------------------------------------------------------------------------------------------------------------------------------------------------------------------------------------------------------------------------------------------------------------------------------------------------------------------------------------------------------------------------------------------------------------------------------------------------------------------------------------------------------------------------------------------------------------------------------------------------------------------------------------------------------------------------------------------------------------------------------------------------------------------------------------------------------------------------------------------------------------------------------------|-------------|
| #78    | Search (#76) AND #77                                                                                                                                                                                                                                                                                                                                                                                                                                                                                                                                                                                                                                                                                                                                                                                                                                                                                                                                                                                                                                                                                                                                                                                                                                                                                                                                                                                                                                                                                                                                 | 331         |
| #77    | Search publisher[sb] NOT pmcbook                                                                                                                                                                                                                                                                                                                                                                                                                                                                                                                                                                                                                                                                                                                                                                                                                                                                                                                                                                                                                                                                                                                                                                                                                                                                                                                                                                                                                                                                                                                     | 502081      |
| #76    | Search (#3) AND #75                                                                                                                                                                                                                                                                                                                                                                                                                                                                                                                                                                                                                                                                                                                                                                                                                                                                                                                                                                                                                                                                                                                                                                                                                                                                                                                                                                                                                                                                                                                                  | 12836       |
| #75    | Search ((#68) OR #71) OR #74                                                                                                                                                                                                                                                                                                                                                                                                                                                                                                                                                                                                                                                                                                                                                                                                                                                                                                                                                                                                                                                                                                                                                                                                                                                                                                                                                                                                                                                                                                                         | 1167787     |
| #74    | Search (#72) OR #73                                                                                                                                                                                                                                                                                                                                                                                                                                                                                                                                                                                                                                                                                                                                                                                                                                                                                                                                                                                                                                                                                                                                                                                                                                                                                                                                                                                                                                                                                                                                  | 547109      |
| #73    | Search ((deprived*[Text Word] OR underserved[Text Word] OR under-served[Text Word] OR transitional[Text Word] OR poor[Text Word] OR underdevel*[Text Word] OR devel*[Text Word] OR low[Text Word] OR lower[Text Word] OR less[Text Word] OR least[Text Word] OR under[Text Word] OR mid[Text Word] OR middle[Text Word] OR third[Text Word])) AND (countr* or nation or econom*)                                                                                                                                                                                                                                                                                                                                                                                                                                                                                                                                                                                                                                                                                                                                                                                                                                                                                                                                                                                                                                                                                                                                                                     | 547054      |
| #72    | Search (LMIC[Text Word] OR LMICs[Text Word] OR LAMIC[Text Word] OR LAMICs[Text Word])                                                                                                                                                                                                                                                                                                                                                                                                                                                                                                                                                                                                                                                                                                                                                                                                                                                                                                                                                                                                                                                                                                                                                                                                                                                                                                                                                                                                                                                                | 1833        |
| #71    | Search (#69) OR #70                                                                                                                                                                                                                                                                                                                                                                                                                                                                                                                                                                                                                                                                                                                                                                                                                                                                                                                                                                                                                                                                                                                                                                                                                                                                                                                                                                                                                                                                                                                                  | 40557       |
| #70    | Search (Tegucigalpa[Text Word] OR Tegus[Text Word] OR New Delhi[Text Word] OR Jakarta[Text Word] OR Nairobi[Text Word] OR South Tarawa[Text Word] OR Tarawa Teinainano[Text Word] OR Pristina[Text Word] OR Prishtina[Text Word] OR Bishkek[Text Word] OR Pishpek[Text Word] OR Frunze[Text Word] OR Vientiane[Text Word] OR Maseru[Text Word] OR Nouakchott[Text Word] OR Palikir[Text Word] OR Chisinau[Text Word] OR Kishinev[Text Word] OR Rabat[Text Word] OR Nay Pyi Taw[Text Word] OR Naypyidaw[Text Word] OR Nepranytau[Text Word] OR Naypyitaw[Text Word] OR Kyetpyay[Text Word] OR Pyinmana[Text Word] OR Kyatpyay[Text Word] OR Pyinmana[Text Word] OR Yangon[Text Word] OR Rangoon[Text Word] OR Managua[Text Word] OR Abuja[Text Word] OR Lagos[Text Word] OR Islamabad[Text Word] OR Port Moresby[Text Word] OR Moresby[Text Word] OR Pom Town[Text Word] OR Manila[Text Word] OR Apia[Text Word] OR Dakar[Text Word] OR Honiara[Text Word] OR Jayawardenepura[Text Word] OR Jayewardenepura[Text Word] OR Khartoum[Text Word] OR Mbabane[Text Word] OR Embabane[Text Word] OR Lobamba[Text Word] OR Damascus[Text Word] OR Dushanbe[Text Word] OR Dyushambe[Text Word] OR Stalinabad[Text Word] OR Dili[Text Word] OR Kyiv[Text Word] OR Kiev[Text Word] OR Tashkent[Text Word] OR Toshkent[Text Word] OR Port Vila[Text Word] OR Hanoi[Text Word] OR Ha Noi[Text Word] OR Sana'a[Text Word] OR Sanaa[Text Word] OR Sana[Text Word] OR Lusaka[Text Word] OR Ulaanbaatar[Text Word] OR Ulan-Bator[Text Word] OR Nuku-Alofa[Text Word]) | 18925       |
| #69    | Search (kabul[Text Word] OR Porto-Novovo[Text Word] OR Hogbonou[Text Word] OR Adjace[Text Word] OR Cotonou[Text Word] OR Kutonu[Text Word])                                                                                                                                                                                                                                                                                                                                                                                                                                                                                                                                                                                                                                                                                                                                                                                                                                                                                                                                                                                                                                                                                                                                                                                                                                                                                                                                                                                                          | 21867       |

|     |                                                                                                                                                                                                                                                                                                                                                                                                                                                                                                                                                                                                                                                                                                                                                                                                                                                                                                                                                                                                                                                                                                                                                                                                                                                                                                                                                                                                                                                                                                                |        |
|-----|----------------------------------------------------------------------------------------------------------------------------------------------------------------------------------------------------------------------------------------------------------------------------------------------------------------------------------------------------------------------------------------------------------------------------------------------------------------------------------------------------------------------------------------------------------------------------------------------------------------------------------------------------------------------------------------------------------------------------------------------------------------------------------------------------------------------------------------------------------------------------------------------------------------------------------------------------------------------------------------------------------------------------------------------------------------------------------------------------------------------------------------------------------------------------------------------------------------------------------------------------------------------------------------------------------------------------------------------------------------------------------------------------------------------------------------------------------------------------------------------------------------|--------|
|     | Word] OR Ouagadougou[Text Word] OR Ouaga[Text Word] OR Bujumbura[Text Word] OR Usumbura[Text Word] OR Phnom Penh[Text Word] OR Bangui[Text Word] OR Bangi[Text Word] OR N'Djamena[Text Word] OR Ndjamena[Text Word] OR Fort Lamy[Text Word] OR Moroni[Text Word] OR Kinshasa[Text Word] OR Asmara[Text Word] OR Asmera[Text Word] OR Addis Ababa[Text Word] OR Addis Abeba[Text Word] OR Banjul[Text Word] OR Bathurst[Text Word] OR Conakry[Text Word] OR Bissau[Text Word] OR Port-au-Prince[Text Word] OR Pyongyang[Text Word] OR Monrovia[Text Word] OR Antananarivo[Text Word] OR Tananarive[Text Word] OR Tana[Text Word] OR Lilongwe[Text Word] OR Bamako[Text Word] OR Maputo[Text Word] OR Lourenco Marques[Text Word] OR Kathmandu[Text Word] OR Niamey[Text Word] OR Kigali[Text Word] OR Freetown[Text Word] OR Free-town[Text Word] OR Mogadishu[Text Word] OR Xamar[Text Word] OR Hamar[Text Word] OR Muqdisho[Text Word] OR Maqadishu[Text Word] OR Juba[Text Word] OR Dodoma[Text Word] OR Dar es Salaam[Text Word] OR Lome[Text Word] OR Kampala[Text Word] OR Harare[Text Word] OR Salisbury[Text Word] OR Yerevan[Text Word] OR Dhaka[Text Word] OR Dacca[Text Word] OR Thimphu[Text Word] OR Thimbu[Text Word] OR Sucre[Text Word] OR Charcas[Text Word] OR La Plata[Text Word] OR Chuquisaca[Text Word] OR La Paz[Text Word] OR Praia[Text Word] OR Yaounde[Text Word] OR Jaunde[Text Word] OR Brazzaville[Text Word] OR Yamoussoukro[Text Word] OR Cairo[Text Word] OR Accra[Text Word]) |        |
| #68 | Search #3 OR #4 OR #5 OR #6 OR #7 OR #9 OR #9 OR #10 OR #11 OR #12 OR #13 OR #14 OR #15 OR #16 OR #17 OR #18 OR #19 OR #20 OR #21 OR #22 OR #23 OR #24 OR #25 OR #26 OR #27 OR #28 OR #30 OR #31 OR #32 OR #33 OR #34 OR #35 OR #36 OR #37 OR #38 OR #39 OR #40 OR #41 OR #42 OR #43 OR #44 OR #45 OR #46 OR #47 OR #48 OR #49 OR #50 OR #51 OR #52 OR #53 OR #54 OR #55 OR #56 OR #57 OR #58 OR #59 OR #60 OR #61 OR #62 OR #63 OR #64 OR #65 OR #66 OR #67                                                                                                                                                                                                                                                                                                                                                                                                                                                                                                                                                                                                                                                                                                                                                                                                                                                                                                                                                                                                                                                   | 704488 |
| #67 | Search (zimbabwe[Text Word] OR rhodesia[Text Word])                                                                                                                                                                                                                                                                                                                                                                                                                                                                                                                                                                                                                                                                                                                                                                                                                                                                                                                                                                                                                                                                                                                                                                                                                                                                                                                                                                                                                                                            | 6530   |
| #66 | Search zambia[Text Word]                                                                                                                                                                                                                                                                                                                                                                                                                                                                                                                                                                                                                                                                                                                                                                                                                                                                                                                                                                                                                                                                                                                                                                                                                                                                                                                                                                                                                                                                                       | 4870   |
| #65 | Search (Yugoslavia[Text Word] OR vojvodina[Text Word])                                                                                                                                                                                                                                                                                                                                                                                                                                                                                                                                                                                                                                                                                                                                                                                                                                                                                                                                                                                                                                                                                                                                                                                                                                                                                                                                                                                                                                                         | 10059  |
| #64 | Search (yemen*[Text Word] OR aden[Text Word] OR sanaa[Text Word])                                                                                                                                                                                                                                                                                                                                                                                                                                                                                                                                                                                                                                                                                                                                                                                                                                                                                                                                                                                                                                                                                                                                                                                                                                                                                                                                                                                                                                              | 2161   |
| #63 | Search (west bank[Text Word] OR gaza[Text Word] OR palestine*[Text Word])                                                                                                                                                                                                                                                                                                                                                                                                                                                                                                                                                                                                                                                                                                                                                                                                                                                                                                                                                                                                                                                                                                                                                                                                                                                                                                                                                                                                                                      | 2685   |
| #62 | Search (vietnam[Text Word] OR viet-nam[Text Word])                                                                                                                                                                                                                                                                                                                                                                                                                                                                                                                                                                                                                                                                                                                                                                                                                                                                                                                                                                                                                                                                                                                                                                                                                                                                                                                                                                                                                                                             | 14854  |
| #61 | Search (vanuatu[Text Word] OR new hebrides[Text Word])                                                                                                                                                                                                                                                                                                                                                                                                                                                                                                                                                                                                                                                                                                                                                                                                                                                                                                                                                                                                                                                                                                                                                                                                                                                                                                                                                                                                                                                         | 592    |
| #60 | Search uzbek*[Text Word]                                                                                                                                                                                                                                                                                                                                                                                                                                                                                                                                                                                                                                                                                                                                                                                                                                                                                                                                                                                                                                                                                                                                                                                                                                                                                                                                                                                                                                                                                       | 2197   |
| #59 | Search ukrain*[Text Word]                                                                                                                                                                                                                                                                                                                                                                                                                                                                                                                                                                                                                                                                                                                                                                                                                                                                                                                                                                                                                                                                                                                                                                                                                                                                                                                                                                                                                                                                                      | 17108  |
| #58 | Search (Tunisia[Text Word] OR Tunis[Text Word])                                                                                                                                                                                                                                                                                                                                                                                                                                                                                                                                                                                                                                                                                                                                                                                                                                                                                                                                                                                                                                                                                                                                                                                                                                                                                                                                                                                                                                                                | 8634   |
| #57 | Search tonga*[Text Word]                                                                                                                                                                                                                                                                                                                                                                                                                                                                                                                                                                                                                                                                                                                                                                                                                                                                                                                                                                                                                                                                                                                                                                                                                                                                                                                                                                                                                                                                                       | 612    |

|     |                                                                                                                                                                                                                                         |       |
|-----|-----------------------------------------------------------------------------------------------------------------------------------------------------------------------------------------------------------------------------------------|-------|
| #56 | Search (Timor Leste[Text Word] OR East Timor[Text Word] OR Portuguese-Timor)                                                                                                                                                            | 376   |
| #55 | Search (Tajikistan[Text Word] OR Tadjik*[Text Word] OR Tadzhi*[Text Word] OR Tajik[Text Word])                                                                                                                                          | 918   |
| #54 | Search syria*[Text Word]                                                                                                                                                                                                                | 10985 |
| #53 | Search swaziland[Text Word]                                                                                                                                                                                                             | 715   |
| #52 | Search (ceylon[Text Word] OR sri lanka[Text Word])                                                                                                                                                                                      | 6755  |
| #51 | Search ((Caroline[Text Word] OR Ellice[Text Word] OR Gilbert[Text Word] OR Johnston[Text Word] OR Mariana[Text Word] OR Marshall[Text Word] OR Pacific[Text Word] OR Solomon[Text Word])) AND (Island[Text Word] OR islands[Text Word]) | 7519  |
| #50 | Search Sao Tome[Text Word]                                                                                                                                                                                                              | 201   |
| #49 | Search samoa*[Text Word]                                                                                                                                                                                                                | 1210  |
| #48 | Search (Philippines[Text Word] OR Philipines[Text Word] OR Phillipines[Text Word] OR Phillippines[Text Word] OR Mindanao[Text Word] OR Luzon[Text Word] OR Visayas[Text Word])                                                          | 10061 |
| #47 | Search Papua[Text Word]                                                                                                                                                                                                                 | 5217  |
| #46 | Search Pakistan[Text Word]                                                                                                                                                                                                              | 17935 |
| #45 | Search nicaragua[Text Word]                                                                                                                                                                                                             | 1799  |
| #44 | Search Nepal[Text Word]                                                                                                                                                                                                                 | 8259  |
| #43 | Search (myanmar[Text Word] OR burma[Text Word])                                                                                                                                                                                         | 3003  |
| #42 | Search (mozambique[Text Word] OR Mocambique[Text Word] OR mozambic[Text Word])                                                                                                                                                          | 2899  |
| #41 | Search (morocco[Text Word] OR ifni[Text Word])                                                                                                                                                                                          | 6246  |
| #40 | Search mongolia*[Text Word]                                                                                                                                                                                                             | 7437  |
| #39 | Search (moldova*[Text Word] OR Moldavia*[Text Word])                                                                                                                                                                                    | 1023  |
| #38 | Search micronesia*[Text Word]                                                                                                                                                                                                           | 1537  |
| #37 | Search (malawi[Text Word] OR nyasaland)                                                                                                                                                                                                 | 6501  |
| #36 | Search (madagascar[Text Word] OR malagasy[Text Word])                                                                                                                                                                                   | 4481  |
| #35 | Search (lesotho[Text Word] OR Basutoland)                                                                                                                                                                                               | 618   |
| #34 | Search (lao[Text Word]) AND democratic republic[Text Word]                                                                                                                                                                              | 344   |
| #33 | Search (laos[Text Word] OR lao pdr[Text Word])                                                                                                                                                                                          | 2331  |
| #32 | Search (Kirghiz*[Text Word] OR Kirgiz*[Text Word] OR Kyrgyz*[Text Word])                                                                                                                                                                | 1507  |
| #31 | Search kosovo[Text Word]                                                                                                                                                                                                                | 743   |



|     |                                                                                                                                                                                                                                                                                                                                                                       |        |
|-----|-----------------------------------------------------------------------------------------------------------------------------------------------------------------------------------------------------------------------------------------------------------------------------------------------------------------------------------------------------------------------|--------|
| #30 | Search Korea[Text Word]                                                                                                                                                                                                                                                                                                                                               | 47383  |
| #28 | Search (kiribati[Text Word] OR nauru[Text Word] OR tuvalu[Text Word])                                                                                                                                                                                                                                                                                                 | 271    |
| #27 | Search Kashmir[Text Word]                                                                                                                                                                                                                                                                                                                                             | 1126   |
| #26 | Search (indonesia*[Text Word] OR Celebes[Text Word] OR East Indies[Text Word] OR Irian Jaya[Text Word] OR Java[Text Word] OR Madoera[Text Word] OR Madura[Text Word] OR Malay Archipelago[Text Word] OR "Netherlands East Indies"[Text Word] OR New Guinea West[Text Word] OR Sulawesi[Text Word] OR Sumatra[Text Word] OR Timor[Text Word] OR West Irian[Text Word]) | 16339  |
| #25 | Search (india[Text Word] OR Sikkim[Text Word])                                                                                                                                                                                                                                                                                                                        | 118053 |
| #24 | Search honduras[Text Word]                                                                                                                                                                                                                                                                                                                                            | 1580   |
| #23 | Search (haiti[Text Word] OR hispaniola[Text Word])                                                                                                                                                                                                                                                                                                                    | 3529   |
| #22 | Search Guatemala[Text Word]                                                                                                                                                                                                                                                                                                                                           | 3634   |
| #21 | Search salvador[Text Word]                                                                                                                                                                                                                                                                                                                                            | 2853   |
| #20 | Search (egypt[Text Word] OR "united arab republic"[Text Word])                                                                                                                                                                                                                                                                                                        | 17267  |
| #19 | Search (katanga[Text Word] OR zaire[Text Word] OR congo[Text Word] OR leopoldville[Text Word])                                                                                                                                                                                                                                                                        | 13026  |
| #18 | Search (comoros[Text Word] OR comores[Text Word] OR comoro[Text Word] OR mayotte[Text Word])                                                                                                                                                                                                                                                                          | 507    |
| #17 | Search (chad[Text Word] OR tchad[Text Word] OR tshad[Text Word])                                                                                                                                                                                                                                                                                                      | 1113   |
| #16 | Search ((central-africa*[Text Word] OR centrafrican[Text Word] OR central african[Text Word])) AND (republic[Text Word] OR empire[Text Word])                                                                                                                                                                                                                         | 1354   |
| #15 | Search ("ubangi-shari"[Text Word] OR Centrafrique[Text Word])                                                                                                                                                                                                                                                                                                         | 2      |
| #14 | Search (cameroun[Text Word] OR cameroon[Text Word])                                                                                                                                                                                                                                                                                                                   | 6212   |
| #13 | Search (cambodia[Text Word] OR Kampuchea*[Text Word] OR Khmer[Text Word] OR kampudja[Text Word])                                                                                                                                                                                                                                                                      | 3772   |
| #12 | Search boliv*[Text Word]                                                                                                                                                                                                                                                                                                                                              | 4178   |
| #11 | Search Bhutan[Text Word]                                                                                                                                                                                                                                                                                                                                              | 499    |
| #10 | Search (Bangladesh[Text Word] OR East-bengal[Text Word])                                                                                                                                                                                                                                                                                                              | 11499  |
| #9  | Search armenia*[Text Word]                                                                                                                                                                                                                                                                                                                                            | 2290   |
| #8  | Search (sudan*[Text Word]) AND republic[Text Word]                                                                                                                                                                                                                                                                                                                    | 259    |
| #7  | Search (West*-Africa[Text Word] OR Benin[Text Word] OR Dahomey[Text Word] OR Burkina Faso[Text Word] OR Upper Volta[Text Word] OR Cape verde[Text Word] OR Cabo Verde[Text Word] OR cap-vert[Text Word] OR cote d'ivoire[Text Word] OR ivory coast[Text Word] OR Cote dilvoire[Text Word] OR Gambia[Text Word] OR Ghana[Text Word] OR Gold Coast[Text                 | 232729 |

|    |                                                                                                                                                                                                                                                                                                                                                                                                      |       |
|----|------------------------------------------------------------------------------------------------------------------------------------------------------------------------------------------------------------------------------------------------------------------------------------------------------------------------------------------------------------------------------------------------------|-------|
|    | Word] OR Guinea[Text Word] OR Liberia[Text Word] OR Mali[Text Word] OR Mauritania[Text Word] OR Mauretania[Text Word] OR Niger[Text Word] OR Nigeria[Text Word] OR Senegal[Text Word] OR Senegambia[Text Word] OR Sierra Leone[Text Word] OR Togo[Text Word] OR Togolese[Text Word] OR Togoland)                                                                                                     |       |
| #6 | Search (Somali*[Text Word]) AND (democratic[Text Word] OR republic[Text Word])                                                                                                                                                                                                                                                                                                                       | 87    |
| #5 | Search (East* Africa[Text Word] OR Burundi[Text Word] OR Djibouti[Text Word] OR Somaliland[Text Word] OR Eritrea[Text Word] OR Ethiopia[Text Word] OR Abyssinia[Text Word] OR Kenya[Text Word] OR Rwanda[Text Word] OR Ruanda[Text Word] OR Somalia[Text Word] OR Sudan[Text Word] OR Tanzania[Text Word] OR Tanganyika[Text Word] OR Zanzibar[Text Word] OR Urundi[Text Word] OR Uganda[Text Word]) | 75694 |
| #4 | Search Afghanistan[Text Word]                                                                                                                                                                                                                                                                                                                                                                        | 5440  |
| #3 | Search (trauma[Text Word]) AND (database*[Text Word] OR data-base*[Text Word] OR regist*[Text Word])                                                                                                                                                                                                                                                                                                 | 12836 |

### 2.3. Ovid Embase

- 1 registration/ (54932)
- 2 disease registry/ (10168)
- 3 registry/ (145878)
- 4 data base/ (335295)
- 5 or/1-4 (513744)
- 6 exp injury/ (2191830)
- 7 emergency health service/ (91437)
- 8 6 or 7 (2259256)
- 9 5 and 8 (52056)
- 10 (trauma adj2 (database\* or data-base\* or regist\*)).tw,kw. (4481)
- 11 9 or 10 (53060)
- 12 Afghanistan/ or afghanistan.tw,kw,in. (7072)
- 13 Armenia/ or armenia\*.tw,kw,in. (6814)
- 14 Bangladesh/ or bangladesh.tw,kw,in. (23520)
- 15 Benin/ or (benin or dahomey).tw,kw,in. (8081)
- 16 Bhutan/ or Bhutan.tw,kw,in. (706)
- 17 Bolivia/ or bolivia.tw,kw,in. (5024)
- 18 burkina faso/ or (burkina faso or upper volta).tw,kw,in. (6194)
- 19 burundi/ or (burundi or urundi).tw,kw,in. (1099)
- 20 Cape verde/ or (Cape verde or Cabo Verde).tw,kw,in. (560)
- 21 Cambodia/ or (cambodia or Kampuchea\* or Khmer or kampudja).tw,kw,in. (5467)
- 22 cameroon/ or (cameroon or cameroun).tw,kw,in. (11067)
- 23 central african republic/ or ("ubangi-shari" or Centrafrique or ((central-africa\* or centrafrican or central african) adj2 (republic or empire))).tw,kw,in. (1196)
- 24 chad/ or (chad or tchad or tshad).tw,kw,in. (1952)
- 25 Comoros/ or (comoro\* or comores or mayotte).tw,kw,in. (786)
- 26 Democratic Republic Congo/ or Congo/ or (brazzaville or kinshasa or katanga or zaire or congo or leopoldville).tw,kw,in. (18488)
- 27 cote d'ivoire/ or (cote d'ivoire or ivory coast or Cote dilvoire).tw,kw,in. (6639)
- 28 Djibouti/ or Djibouti.tw,kw,in. (525)
- 29 Egypt/ or (egypt or "united arab republic").tw,kw,in. (95406)
- 30 El Salvador/ or (salvador or el salvador).tw,kw,in. (24443)
- 31 eritrea/ or Eritrea.tw,kw,in. (3313)
- 32 Ethiopia/ or (Ethiopia or Abyssinia).tw,kw,in. (15681)
- 33 gambia/ or gambia.tw,kw,in. (4468)
- 34 Ghana/ or (ghana or gold coast).tw,kw,in. (20170)
- 35 Guatemala/ or Guatemala.tw,kw,in. (6067)
- 36 Guinea/ or Guinea.tw,kw,in. (141931)
- 37 Guinea-Bissau/ (1019)
- 38 Haiti/ or (haiti or hispaniola).tw,kw,in. (4323)
- 39 Honduras/ or honduras.tw,kw,in. (2439)
- 40 exp India/ or (india or Sikkim).tw,kw,in. (673495)
- 41 Indonesia/ or (indonesia\* or Celebes or East Indies or Irian Jaya or Java or Madoera or Madura or Malay Archipelago or "Netherlands East Indies" or New Guinea West or Sulawesi or Sumatra or Timor or West Irian).tw,kw,in. (33232)

- 42 (kashmir or cashmere).tw,kw,in. (5343)
- 43 kenya/ or kenya.tw,kw,in. (30568)
- 44 kiribati/ or kiribati.tw,kw,in. (163)
- 45 North Korea/ or (North Korea or (Korea adj5 people's republic)).tw,kw,in. (1043)
- 46 Kosovo/ or kosovo.tw,kw,in. (1408)
- 47 Kyrgyzstan/ or (Kirghiz\* or Kirgiz or Kyrgyz).tw,kw,in. (1941)
- 48 Laos/ or (laos or lao pdr or (lao and democratic republic)).tw,kw,in. (2997)
- 49 Lesotho/ or (lesotho or Basutoland).tw,kw,in. (801)
- 50 liberia/ or liberia.tw,kw,in. (2043)
- 51 Madagascar/ or (madagascar or Malagasy).tw,kw,in. (5837)
- 52 Malawi/ or malawi.tw,kw,in. (8114)
- 53 mali/ or mali.tw,kw,in. (6604)
- 54 Mauritania/ or (mauritania or mauretania).tw,kw,in. (804)
- 55 Federated States of Micronesia/ or micronesia.tw,kw,in. (1146)
- 56 Moldova/ or (moldova or Moldavia\*).tw,kw,in. (2728)
- 57 Mongolia/ or Inner Mongolia/ or mongolia\*.tw,kw,in. (13853)
- 58 Morocco/ or (morocco or ifni).tw,kw,in. (23719)
- 59 Mozambique/ or (mozambique or Mocambique or mozambic or "Portuguese East Africa").tw,kw,in. (4373)
- 60 Myanmar/ or (myanmar or burma).tw,kw,in. (4258)
- 61 Nepal/ or Nepal.tw,kw,in. (13919)
- 62 Nicaragua/ or nicaragua.tw,kw,in. (2548)
- 63 niger/ or niger.tw,kw,in. (15452)
- 64 nigeria/ or nigeria.tw,kw,in. (61654)
- 65 Pakistan/ or Pakistan.tw,kw,in. (58726)
- 66 Papua New Guinea/ or Papua New Guinea.tw,kw,in. (8084)
- 67 Philippines/ or (Philippines or Philipines or Phillipines or Phillippines or Mindanao or Luzon or Visayas).tw,kw,in. (20592)
- 68 rwanda/ or (Rwanda or Ruanda).tw,kw,in. (3839)
- 69 Samoa/ or samoa\*.tw,kw,in. (1502)
- 70 "Sao Tome and Principe"/ or sao tome.tw,kw,in. (218)
- 71 senegal/ or (senegal or Senegambia).tw,kw,in. (11470)
- 72 sierra leone/ or sierra leone.tw,kw,in. (2447)
- 73 ((Caroline or Ellice or Gilbert or Johnston or Mariana or Marshall or Pacific or Solomon) adj1 (Island or islands)).tw,kw,in. (3952)
- 74 somalia/ or somalia.tw,kw,in. (2085)
- 75 sudan/ or sudan.tw,kw,in. (13584)
- 76 Sri Lanka/ or (sri lanka or ceylon).tw,kw,in. (12754)
- 77 Swaziland/ or swaziland.tw,kw,in. (1250)
- 78 Syrian Arab Republic/ or syria\*.tw,kw,in. (15302)
- 79 Tajikistan/ or (Tajikistan or Tadjik\* or Tadzhi\* or tajik\*).tw,kw,in. (3059)
- 80 tanzania/ or (Tanzania or Tanganyika or Zanzibar).tw,kw,in. (17598)
- 81 Timor-Leste/ or (Timor Leste or East Timor or Portuguese Timor).tw,kw,in. (566)
- 82 togo/ or (togo or togolese).tw,kw,in. (3469)
- 83 Tonga/ or tonga\*.tw,kw,in. (1112)
- 84 Tunisia/ or (Tunisia or Tunis).tw,kw,in. (34817)
- 85 uganda/ or uganda.tw,kw,in. (20422)

- 86 Ukraine/ or ukraine\*.tw,kw,in. (54023)
- 87 uzbekistan/ or uzbek\*.tw,kw,in. (5387)
- 88 Vanuatu/ or (Vanuatu or new Hebrides).tw,kw,in. (710)
- 89 viet nam/ or (vietnam or viet nam).tw,kw,in. (23170)
- 90 palestine/ or (west bank or gaza or palestin\*).tw,kw,in. (5699)
- 91 Yemen/ or (yemen\* or aden or sana?a).tw,kw,in. (7276)
- 92 Zambia/ or zambia.tw,kw,in. (7442)
- 93 Zimbabwe/ or (zimbabwe or rhodesia or nyasaland).tw,kw,in. (10116)
- 94 Yugoslavia/ (9719)
- 95 limit 94 to yr="1994 - 2013" (2687)
- 96 or/12-93,95 (1562723)
- 97 (kabul or Porto-Novo or Hogbonou or Adjace or Cotonou or Kutonu or Ouagadougou or Ouaga or Bujumbura or Usumbura or Phnom Penh or Bangui or Bangi or N'Djamena or Ndjamenia or Fort Lamy or Moroni or Kinshasa or Asmara or Asmera or Addis Ababa or Addis Abeba or Banjul or Bathurst or Conakry or Bissau or Port-au-Prince or Pyongyang or Monrovia or Antananarivo or Tananarive or Tana or Lilongwe or Bamako or Maputo or Lourenco Marques or Kathmandu or Niamey or Kigali or Freetown or Free-town or Mogadishu or Xamar or Hamar or Muqdisho or Maqadishu or Juba or Dodoma or Dar es Salaam or Lome or Kampala or Harare or Salisbury or Yerevan or Dhaka or Dacca or Thimphu or Thimbu or Sucre or Charcas or La Plata or Chuquisaca or La Paz or Praia or Yaounde or Jaunde or Brazzaville or Yamoussoukro or Cairo or Accra).tw,kw,in. (193523)
- 98 (Tegucigalpa or Tegus or New Delhi or Jakarta or Nairobi or South Tarawa or Tarawa Teinainano or Pristina or Prishtina or Bishkek or Pishpek or Frunze or Vientiane or Maseru or Nouakchott or Palikir or Chisinau or Kishinev or Rabat or Nay Pyi Taw or Naypyidaw or Nepranytau or Naypyitaw or Kyetpyay or Pyinmana or Kyatpyay or Pyinmana or Yangon or Rangoon or Managua or Abuja or Lagos or Islamabad or Port Moresby or Moresby or Pom Town or Manila or Apia or Dakar or Honiara or Jayawardenepura or Jayewardenepura or Khartoum or Mbabane or Embabane or Lobamba or Damascus or Dushanbe or Dyushambe or Stalinabad or Dili or Kyiv or Kiev or Tashkent or Toshkent or Port Vila or Hanoi or Ha Noi or Sana'a or Sanaa or Sana or Lusaka or Ulaanbaatar or Ulan-Bator or Nuku-Alofa).tw,kw,in. (216360)
- 99 97 or 98 (403715)
- 100 developing country/ (101086)
- 101 (LMIC or LMICs or LAMIC or LAMICs or ((deprived\* or underserved or under-served or transitional or poor or underdevel\* or devel\* or low\* or less or least or under or mid\* or third) adj3 (countr\* or nation or econom\*))).tw,kw. (138689)
- 102 100 or 101 (188955)
- 103 96 or 99 or 102 (1762761)
- 104 11 and 103 (2804)
- 105 remove duplicates from 104 (2644)

## 2.4. Africa-Wide Information

| #   | Query                                                                                                                                                                                                                                                                                                                                                                                                                                                                                                                                                                                                                                                                                                                                                                                                                                      | Results   |
|-----|--------------------------------------------------------------------------------------------------------------------------------------------------------------------------------------------------------------------------------------------------------------------------------------------------------------------------------------------------------------------------------------------------------------------------------------------------------------------------------------------------------------------------------------------------------------------------------------------------------------------------------------------------------------------------------------------------------------------------------------------------------------------------------------------------------------------------------------------|-----------|
| S67 | S1 AND S66                                                                                                                                                                                                                                                                                                                                                                                                                                                                                                                                                                                                                                                                                                                                                                                                                                 | 62        |
| S66 | S61 OR S64 OR S65                                                                                                                                                                                                                                                                                                                                                                                                                                                                                                                                                                                                                                                                                                                                                                                                                          | 1,558,344 |
| S65 | TX LMIC or LMICs or LAMIC or LAMICs or ((deprived* or underserved or under-served or transitional or poor or underdevel* or devel* or low* or less or least or under or mid* or third) N3 (countr* or nation or econom*))                                                                                                                                                                                                                                                                                                                                                                                                                                                                                                                                                                                                                  | 187,408   |
| S64 | S62 OR S63                                                                                                                                                                                                                                                                                                                                                                                                                                                                                                                                                                                                                                                                                                                                                                                                                                 | 589,877   |
| S63 | TX Tegucigalpa or Tegus or New Delhi or Jakarta or Nairobi or South Tarawa or Tarawa Teinainano or Pristina or Prishtina or Bishkek or Pishpek or Frunze or Vientiane or Maseru or Nouakchott or Palikir or Chisinau or Kishinev or Rabat or Nay Pyi Taw or Naypyidaw or Nepranytau or Naypyitaw or Kyetpyay or Pyinmana or Kyatpyay or Pyinmana or Yangon or Rangoon or Managua or Abuja or Lagos or Islamabad or Port Moresby or Moresby or Pom Town or Manila or Apia or Dakar or Honiara or Jayawardenepura or Jayewardenepura or Khartoum or Mbabane or Embabane or Lobamba or Damascus or Dushanbe or Dyushambe or Stalinabad or Dili or Kyiv or Kiev or Tashkent or Toshkent or Port Vila or Hanoi or Ha Noi or Sana'a or Sanaa or Sana or Lusaka or Ulaanbaatar or Ulan-Bator or Nuku-Alofa                                        | 210,583   |
| S62 | TX kabul or Porto-Novu or Hogbonou or Adjace or Cotonou or Kutonu or Ouagadougou or Ouaga or Bujumbura or Usumbura or Phnom Penh or Bangui or Bangi or N'Djamena or Ndjamenia or Fort Lamy or Moroni or Kinshasa or Asmara or Asmera or Addis Ababa or Addis Abeba or Banjul or Bathurst or Conakry or Bissau or Port-au-Prince or Pyongyang or Monrovia or Antananarivo or Tananarive or Tana or Lilongwe or Bamako or Maputo or Lourenco Marques or Kathmandu or Niamey or Kigali or Freetown or Free-town or Mogadishu or Xamar or Hamar or Muqdisho or Maqadishu or Juba or Dodoma or Dar es Salaam or Lome or Kampala or Harare or Salisbury or Yerevan or Dhaka or Dacca or Thimphu or Thimbu or Sucre or Charcas or La Plata or Chuquisaca or La Paz or Praia or Yaounde or Jaunde or Brazzaville or Yamoussoukro or Cairo or Accra | 418,662   |
| S61 | S2 OR S3 OR S4 OR S5 OR S6 OR S7 OR S8 OR S9 OR S10 OR S11 OR S12 OR S13 OR S14 OR S15 OR S16 OR S17 OR S18 OR S19 OR S20 OR S21 OR S22 OR S23 OR S24 OR S25 OR S26 OR S27 OR S28 OR S29 OR S30 OR S31 OR S32 OR S33 OR S34 OR S35 OR S36 OR S37 OR S38 OR S39 OR S40 OR S41 OR S42 OR S43 OR S44 OR S45 OR S46 OR S47 OR S48 OR S49 OR S50 OR S51 OR S52 OR S53 OR S54 OR S55 OR S56 OR S57 OR S58 OR S59 OR S60                                                                                                                                                                                                                                                                                                                                                                                                                          | 1,427,580 |
| S60 | TX zimbabwe or rhodesia                                                                                                                                                                                                                                                                                                                                                                                                                                                                                                                                                                                                                                                                                                                                                                                                                    | 118,682   |
| S59 | TX zambia                                                                                                                                                                                                                                                                                                                                                                                                                                                                                                                                                                                                                                                                                                                                                                                                                                  | 35,950    |
| S58 | TX Yugoslavia or vojvodina                                                                                                                                                                                                                                                                                                                                                                                                                                                                                                                                                                                                                                                                                                                                                                                                                 | 1,736     |

|     |                                                                                                                                                         |        |
|-----|---------------------------------------------------------------------------------------------------------------------------------------------------------|--------|
| S57 | TX yemen* or aden or sanaa                                                                                                                              | 12,141 |
| S56 | TX west bank or gaza or palestine*                                                                                                                      | 60,085 |
| S55 | TX vietnam or viet-nam                                                                                                                                  | 7,078  |
| S54 | TX vanuatu or new hebrides                                                                                                                              | 774    |
| S53 | TX uzbek*                                                                                                                                               | 1,062  |
| S52 | TX ukrain*                                                                                                                                              | 3,986  |
| S51 | TX Tunisia or Tunis                                                                                                                                     | 43,149 |
| S50 | TX tonga*                                                                                                                                               | 2,100  |
| S49 | TX Timor Leste or East Timor or Portuguese-Timor                                                                                                        | 938    |
| S48 | TX Tajikistan or Tadjik* or Tadzhiq* or Tajik                                                                                                           | 851    |
| S47 | TX syria*                                                                                                                                               | 28,866 |
| S46 | TX swaziland                                                                                                                                            | 13,496 |
| S45 | TX ceylon or sri lanka                                                                                                                                  | 5,020  |
| S44 | TX (Caroline or Ellice or Gilbert or Johnston or Mariana or Marshall or Pacific or Solomon) N1 (Island or islands)                                      | 2,246  |
| S43 | TX Sao Tome                                                                                                                                             | 4,400  |
| S42 | TX samoa*                                                                                                                                               | 598    |
| S41 | TX Philippines or Philipines or Phillipines or Phillippines or Mindanao or Luzon or Visayas                                                             | 8,915  |
| S40 | TX Papua                                                                                                                                                | 5,386  |
| S39 | TX Pakistan                                                                                                                                             | 18,571 |
| S38 | TX nicaragua                                                                                                                                            | 1,612  |
| S37 | TX Nepal                                                                                                                                                | 3,863  |
| S36 | TX myanmar or burma                                                                                                                                     | 3,484  |
| S35 | TX mozambique or Mocambique or mozambic                                                                                                                 | 35,127 |
| S34 | TX morocco or ifni                                                                                                                                      | 58,631 |
| S33 | TX mongolia*                                                                                                                                            | 3,260  |
| S32 | TX moldova* or Moldavia*                                                                                                                                | 438    |
| S31 | TX micronesia*                                                                                                                                          | 359    |
| S30 | TX malawi or nyasaland                                                                                                                                  | 26,931 |
| S29 | TX madagascar or malagasy                                                                                                                               | 30,926 |
| S28 | TX lesotho or Basutoland                                                                                                                                | 16,343 |
| S27 | TX laos or lao pdr or (lao and democratic republic)                                                                                                     | 2,236  |
| S26 | TX Kirghiz* or Kirgiz* or Kyrgyz*                                                                                                                       | 664    |
| S25 | TX kosovo                                                                                                                                               | 1,328  |
| S24 | TX North* Korea or (Korea adj5 demo*)                                                                                                                   | 3,378  |
| S23 | TX kiribati or nauru or tuvalu                                                                                                                          | 403    |
| S22 | TX Kashmir                                                                                                                                              | 1,117  |
| S21 | TX indonesia* or Celebes or East Indies or Irian Jaya or Java or Madoera or Madura or Malay Archipelago or "Netherlands East Indies" or New Guinea West | 17,839 |

|     |                                                                                                                                                                                                                                                                                                                                                                            |         |
|-----|----------------------------------------------------------------------------------------------------------------------------------------------------------------------------------------------------------------------------------------------------------------------------------------------------------------------------------------------------------------------------|---------|
|     | or Sulawesi or Sumatra or Timor or West Irian                                                                                                                                                                                                                                                                                                                              |         |
| S20 | TX india or Sikkim                                                                                                                                                                                                                                                                                                                                                         | 68,207  |
| S19 | TX honduras                                                                                                                                                                                                                                                                                                                                                                | 1,091   |
| S18 | TX haiti or hispaniola                                                                                                                                                                                                                                                                                                                                                     | 3,192   |
| S17 | TX Guatemala                                                                                                                                                                                                                                                                                                                                                               | 2,061   |
| S16 | TX salvador                                                                                                                                                                                                                                                                                                                                                                | 2,431   |
| S15 | TX egypt or "united arab republic"                                                                                                                                                                                                                                                                                                                                         | 203,015 |
| S14 | TX katanga or zaire or congo or leopoldville                                                                                                                                                                                                                                                                                                                               | 62,825  |
| S13 | TX comoros or comores or comoro or mayotte                                                                                                                                                                                                                                                                                                                                 | 4,062   |
| S12 | TX chad or tchad or tshad                                                                                                                                                                                                                                                                                                                                                  | 21,204  |
| S11 | TX "ubangi-shari" or Centrafrique or ((central-africa* or centrafrican or central african) N2 (republic or empire))                                                                                                                                                                                                                                                        | 9,234   |
| S10 | TX cameroun or cameroon                                                                                                                                                                                                                                                                                                                                                    | 33,873  |
| S9  | TX cambodia or Kampuchea* or Khmer or kampudja                                                                                                                                                                                                                                                                                                                             | 4,184   |
| S8  | TX boliv*                                                                                                                                                                                                                                                                                                                                                                  | 3,174   |
| S7  | TX Bhutan                                                                                                                                                                                                                                                                                                                                                                  | 374     |
| S6  | TX Bangladesh or East-bengal                                                                                                                                                                                                                                                                                                                                               | 6,708   |
| S5  | TX armenia*                                                                                                                                                                                                                                                                                                                                                                | 1,723   |
| S4  | TX West*-Africa or Benin or Dahomey or Burkina Faso or Upper Volta or Cape verde or Cabo Verde or cap-vert or cote d'ivoire or ivory coast or Cote dilvoire or Gambia or Ghana or Gold Coast or Guinea or Liberia or Mali or Mauritania or Mauretania or Niger or Nigeria or Senegal or Senegambia or Sierra Leone or Togo or Togolese or Togoland or (sudan* N1 republic) | 504,248 |
| S3  | TX East* Africa or Burundi or Djibouti or Somaliland or Eritrea or Ethiopia or Abyssinia or Kenya or Rwanda or Ruanda or Somalia or Sudan or Tanzania or Tanganyika or Zanzibar or Urundi or Uganda or (Somali* N1 (democratic or republic))                                                                                                                               | 420,964 |
| S2  | TX Afghanistan                                                                                                                                                                                                                                                                                                                                                             | 10,593  |
| S1  | TX trauma N2 (database* or data-base* or regist*)                                                                                                                                                                                                                                                                                                                          | 180     |



## 2.5. Biosis Previews

- 1 (trauma adj2 (database\* or data-base\* or regist\*)).ti,ab,mi. (1347)
- 2 afghanistan.ti,ab,mi,ge,cy. (4164)
- 3 (East\* Africa or Burundi or Djibouti or Somaliland or Eritrea or Ethiopia or Abyssinia or Kenya or Rwanda or Ruanda or Somalia or Sudan or Tanzania or Tanganyika or Zanzibar or Urundi or Uganda or (Somali\* adj1 (democratic or republic))).ti,ab,mi,ge,cy. (83718)
- 4 (West\*-Africa or Benin or Dahomey or Burkina Faso or Upper Volta or Cape verde or Cabo Verde or cap-vert or cote d'ivoire or ivory coast or Cote dilvoire or Gambia or Ghana or Gold Coast or Guinea or Liberia or Mali or Mauritania or Mauretania or Niger or Nigeria or Senegal or Senegambia or Sierra Leone or Togo or Togolese or Togoland or (sudan\* adj1 republic)).ti,ab,mi,ge,cy. (265352)
- 5 armenia\*.ti,ab,mi,ge,cy. (7194)
- 6 (Bangladesh or East-bengal).ti,ab,mi,ge,cy. (17875)
- 7 Bhutan.ti,ab,mi,ge,cy. (1282)
- 8 boliv\*.ti,ab,mi,ge,cy. (12238)
- 9 (cambodia or Kampuchea\* or Khmer or kampudja).ti,ab,mi,ge,cy. (3754)
- 10 (cameroun or cameroon).ti,ab,mi,ge,cy. (9865)
- 11 ("ubangi-shari" or Centrafrique or ((central-africa\* or centrafrican or central african) adj2 (republic or empire))).ti,ab,mi,ge,cy. (1178)
- 12 (chad or tchad or tshad).ti,ab,mi,ge,cy. (1433)
- 13 (comoros or comores or comoro or mayotte).ti,ab,mi,ge,cy. (1203)
- 14 (katanga or zaire or congo or leopoldville).ti,ab,mi,ge,cy. (14394)
- 15 (egypt or "united arab republic").ti,ab,mi,ge,cy. (62893)
- 16 salvador.ti,ab,mi,ge,cy. (2619)
- 17 Guatemala.ti,ab,mi,ge,cy. (5869)
- 18 (haiti or hispaniola).ti,ab,mi,ge,cy. (3198)
- 19 honduras.ti,ab,mi,ge,cy. (3179)
- 20 (india or Sikkim).ti,ab,mi,ge,cy. (563475)
- 21 (indonesia\* or Celebes or East Indies or Irian Jaya or Java or Madoera or Madura or Malay Archipelago or "Netherlands East Indies" or New Guinea West or Sulawesi or Sumatra or Timor or West Irian).ti,ab,mi,ge,cy. (32535)
- 22 Kashmir.ti,ab,mi,ge,cy. (3174)
- 23 (kiribati or nauru or tuvalu).ti,ab,mi,ge,cy. (405)
- 24 (North\* Korea or (Korea adj5 demo\*)).ti,ab,mi,ge,cy. (3953)
- 25 kosovo.ti,ab,mi,ge,cy. (560)
- 26 (Kirghiz\* or Kirgiz\* or Kyrgyz\*).ti,ab,mi,ge,cy. (2213)
- 27 (laos or lao pdr or (lao and democratic republic)).ti,ab,mi,ge,cy. (3662)
- 28 (lesotho or Basutoland).ti,ab,mi,ge,cy. (909)
- 29 (madagascar or malagasy).ti,ab,mi,ge,cy. (14694)
- 30 (malawi or nyasaland).ti,ab,mi,ge,cy. (6018)
- 31 micronesia\*.ti,ab,mi,ge,cy. (1603)
- 32 (moldova\* or Moldavia\*).ti,ab,mi,ge,cy. (2755)
- 33 mongolia\*.ti,ab,mi,ge,cy. (16016)
- 34 (morocco or ifni).ti,ab,mi,ge,cy. (15059)
- 35 (mozambique or Mocambique or mozambic).ti,ab,mi,ge,cy. (4802)
- 36 (myanmar or burma).ti,ab,mi,ge,cy. (5665)

- 37 Nepal.ti,ab,mi,ge,cy. (9885)
- 38 nicaragua.ti,ab,mi,ge,cy. (2793)
- 39 Pakistan.ti,ab,mi,ge,cy. (46781)
- 40 Papua.ti,ab,mi,ge,cy. (8711)
- 41 (Philippines or Philipines or Phillipines or Phillippines or Mindanao or Luzon or Visayas).ti,ab,mi,ge,cy. (21264)
- 42 samoa\*.ti,ab,mi,ge,cy. (1800)
- 43 Sao Tome.ti,ab,mi,ge,cy. (528)
- 44 ((Caroline or Ellice or Gilbert or Johnston or Mariana or Marshall or Pacific or Solomon) adj1 (Island or islands)).ti,ab,mi,ge,cy. (5634)
- 45 (ceylon or sri lanka).ti,ab,mi,ge,cy. (11736)
- 46 swaziland.ti,ab,mi,ge,cy. (1074)
- 47 syria\*.ti,ab,mi,ge,cy. (16384)
- 48 (Tajikistan or Tadjik\* or Tadzihik\* or Tajik).ti,ab,mi,ge,cy. (2987)
- 49 (Timor Leste or East Timor or Portuguese-Timor).ti,ab,mi,ge,cy. (307)
- 50 tonga\*.ti,ab,mi,ge,cy. (1454)
- 51 (Tunisia or Tunis).ti,ab,mi,ge,cy. (21066)
- 52 ukrain\*.ti,ab,mi,ge,cy. (41554)
- 53 uzbek\*.ti,ab,mi,ge,cy. (7247)
- 54 (vanuatu or new hebrides).ti,ab,mi,ge,cy. (1475)
- 55 (vietnam or viet-nam).ti,ab,mi,ge,cy. (18990)
- 56 (west bank or gaza or palestin\*).ti,ab,mi,ge,cy. (2018)
- 57 (yemen\* or aden or sanaa).ti,ab,mi,ge,cy. (3152)
- 58 (Yugoslavia or vojvodina).ti,ab,mi,ge,cy. (31783)
- 59 zambia.ti,ab,mi,ge,cy. (5745)
- 60 (zimbabwe or rhodesia).ti,ab,mi,ge,cy. (9540)
- 61 or/2-60 (1347298)
- 62 (kabul or Porto-Novo or Hogbonou or Adjace or Cotonou or Kutonu or Ouagadougou or Ouaga or Bujumbura or Usumbura or Phnom Penh or Bangui or Bangi or N'Djamena or Ndjamena or Fort Lamy or Moroni or Kinshasa or Asmara or Asmera or Addis Ababa or Addis Abeba or Banjul or Bathurst or Conakry or Bissau or Port-au-Prince or Pyongyang or Monrovia or Antananarivo or Tananarive or Tana or Lilongwe or Bamako or Maputo or Lourenco Marques or Kathmandu or Niamey or Kigali or Freetown or Free-town or Mogadishu or Xamar or Hamar or Muqdisho or Maqadishu or Juba or Dodoma or Dar es Salaam or Lome or Kampala or Harare or Salisbury or Yerevan or Dhaka or Dacca or Thimphu or Thimbu or Sucre or Charcas or La Plata or Chuquisaca or La Paz or Praia or Yaounde or Jaunde or Brazzaville or Yamoussoukro or Cairo or Accra).ti,ab,mi,ge,cy. (18273)
- 63 (Tegucigalpa or Tegus or New Delhi or Jakarta or Nairobi or South Tarawa or Tarawa Teinainano or Pristina or Prishtina or Bishkek or Pishpek or Frunze or Vientiane or Maseru or Nouakchott or Palikir or Chisinau or Kishinev or Rabat or Nay Pyi Taw or Naypyidaw or Nepranytau or Naypyitaw or Kyetpyay or Pynmana or Kyatpyay or Pynmana or Yangon or Rangoon or Managua or Abuja or Lagos or Islamabad or Port Moresby or Moresby or Pom Town or Manila or Apia or Dakar or Honiara or Jayawardenepura or Jayawardenepura or Khartoum or Mbabane or Embabane or Lobamba or Damascus or Dushanbe or Dyushambe or Stalinabad or Dili or Kyiv or Kiev or Tashkent or Toshkent or Port Vila or Hanoi or Ha Noi or Sana'a or Sanaa or Sana or Lusaka or Ulaanbaatar or Ulan-Bator or Nuku-Alofa).ti,ab,mi,ge,cy. (17613)
- 64 62 or 63 (35690)

- 65 (LMIC or LMICs or LAMIC or LAMICs or ((deprived\* or underserved or under-served or transitional or poor or underdevel\* or devel\* or low\* or less or least or under or mid\* or third) adj3 (countr\* or nation or econom\*))).ti,ab,mi. (67320)
- 66 61 or 64 or 65 (1403294)
- 67 1 and 66 (92)
- 68 remove duplicates from 67 (84)

## 2.6. The Cochrane Library

| ID | SEARCH                                                        | RESULTS |
|----|---------------------------------------------------------------|---------|
| #1 | (trauma near/2 (database* or data-base* or regist*)):ti,ab,kw | 58      |

## 2.7.

## 2.8. Global Health

- 1 (trauma adj2 (database\* or data-base\* or regist\*)).ti,ab,id. (329)
- 2 Afghanistan.ti,ab,id,in,gl. (1701)
- 3 (East\* Africa or Burundi or Djibouti or Somaliland or Eritrea or Ethiopia or Abyssinia or Kenya or Rwanda or Ruanda or Somalia or Sudan or Tanzania or Tanganyika or Zanzibar or Urundi or Uganda or (Somali\* adj1 (democratic or republic))).ti,ab,id,in,gl. (48302)
- 4 (West\*-Africa or Benin or Dahomey or Burkina Faso or Upper Volta or Cape verde or Cabo Verde or cap-vert or cote d'ivoire or ivory coast or Cote dilvoire or Gambia or Ghana or Gold Coast or Guinea or Liberia or Mali or Mauritania or Mauretania or Niger or Nigeria or Senegal or Senegambia or Sierra Leone or Togo or Togolese or Togoland or (sudan\* adj1 republic)).ti,ab,id,in,gl. (81450)
- 5 armenia\*.ti,ab,id,in,gl. (901)
- 6 (Bangladesh or East-bengal).ti,ab,id,in,gl. (11003)
- 7 Bhutan.ti,ab,id,in,gl. (386)
- 8 boliv\*.ti,ab,id,in,gl. (3162)
- 9 (cambodia or Kampuchea\* or Khmer or kampudja).ti,ab,id,in,gl. (2471)
- 10 (cameroun or cameroon).ti,ab,id,in,gl. (6359)
- 11 ("ubangi-shari" or Centrafrique or ((central-africa\* or centrafrican or central african) adj2 (republic or empire))).ti,ab,id,in,gl. (903)
- 12 (chad or tchad or tshad).ti,ab,id,in,gl. (813)
- 13 (comoros or comores or comoro or mayotte).ti,ab,id,in,gl. (435)
- 14 (katanga or zaire or congo or leopoldville).ti,ab,id,in,gl. (7083)
- 15 (egypt or "united arab republic").ti,ab,id,in,gl. (23203)
- 16 salvador.ti,ab,id,in,gl. (4383)
- 17 Guatemala.ti,ab,id,in,gl. (2906)
- 18 (haiti or hispaniola).ti,ab,id,in,gl. (1681)
- 19 honduras.ti,ab,id,in,gl. (929)
- 20 (india or Sikkim).ti,ab,id,in,gl. (165425)
- 21 (indonesia\* or Celebes or East Indies or Irian Jaya or Java or Madoera or Madura or Malay Archipelago or "Netherlands East Indies" or New Guinea West or Sulawesi or Sumatra or Timor or West Irian).ti,ab,id,in,gl. (9787)
- 22 Kashmir.ti,ab,id,in,gl. (1961)
- 23 (kiribati or nauru or tuvalu).ti,ab,id,in,gl. (194)
- 24 (North\* Korea or (Korea adj5 demo\*)).ti,ab,id,in,gl. (378)
- 25 kosovo.ti,ab,id,in,gl. (420)
- 26 (Kirghiz\* or Kirgiz\* or Kyrgyz\*).ti,ab,id,in,gl. (483)
- 27 (laos or lao pdr or (lao and democratic republic)).ti,ab,id,in,gl. (1482)
- 28 (lesotho or Basutoland).ti,ab,id,in,gl. (487)
- 29 (madagascar or malagasy).ti,ab,id,in,gl. (2537)
- 30 (malawi or nyasaland).ti,ab,id,in,gl. (4613)
- 31 micronesia\*.ti,ab,id,in,gl. (312)
- 32 (moldova\* or Moldavia\*).ti,ab,id,in,gl. (573)
- 33 mongolia\*.ti,ab,id,in,gl. (3106)
- 34 (morocco or ifni).ti,ab,id,in,gl. (5205)
- 35 (mozambique or Mocambique or mozambic).ti,ab,id,in,gl. (2197)
- 36 (myanmar or burma).ti,ab,id,in,gl. (2716)

- 37 Nepal.ti,ab,id,in,gl. (5506)
- 38 nicaragua.ti,ab,id,in,gl. (1089)
- 39 Pakistan.ti,ab,id,in,gl. (18100)
- 40 Papua.ti,ab,id,in,gl. (3276)
- 41 (Philippines or Philipines or Phillipines or Phillippines or Mindanao or Luzon or Visayas).ti,ab,id,in,gl. (6071)
- 42 samoa\*.ti,ab,id,in,gl. (575)
- 43 Sao Tome.ti,ab,id,in,gl. (137)
- 44 ((Caroline or Ellice or Gilbert or Johnston or Mariana or Marshall or Pacific or Solomon) adj1 (Island or islands)).ti,ab,id,in,gl. (1544)
- 45 (ceylon or sri lanka).ti,ab,id,in,gl. (4992)
- 46 swaziland.ti,ab,id,in,gl. (606)
- 47 syria\*.ti,ab,id,in,gl. (2323)
- 48 (Tajikistan or Tadjik\* or Tadzihik\* or Tajik).ti,ab,id,in,gl. (523)
- 49 (Timor Leste or East Timor or Portuguese-Timor).ti,ab,id,in,gl. (253)
- 50 tonga\*.ti,ab,id,in,gl. (337)
- 51 (Tunisia or Tunis).ti,ab,id,in,gl. (6416)
- 52 ukrain\*.ti,ab,id,in,gl. (3799)
- 53 uzbek\*.ti,ab,id,in,gl. (1773)
- 54 (vanuatu or new hebrides).ti,ab,id,in,gl. (423)
- 55 (vietnam or viet-nam).ti,ab,id,in,gl. (6964)
- 56 (west bank or gaza or palestin\*).ti,ab,id,in,gl. (1318)
- 57 (yemen\* or aden or sanaa).ti,ab,id,in,gl. (1557)
- 58 (Yugoslavia or vojvodina).ti,ab,id,in,gl. (3450)
- 59 zambia.ti,ab,id,in,gl. (3804)
- 60 (zimbabwe or rhodesia).ti,ab,id,in,gl. (4416)
- 61 or/2-60 (433104)
- 62 (kabul or Porto-Novu or Hogbonou or Adjace or Cotonou or Kutonu or Ouagadougou or Ouaga or Bujumbura or Usumbura or Phnom Penh or Bangui or Bangi or N'Djamena or Ndjamena or Fort Lamy or Moroni or Kinshasa or Asmara or Asmera or Addis Ababa or Addis Abeba or Banjul or Bathurst or Conakry or Bissau or Port-au-Prince or Pyongyang or Monrovia or Antananarivo or Tananarive or Tana or Lilongwe or Bamako or Maputo or Lourenco Marques or Kathmandu or Niamey or Kigali or Freetown or Free-town or Mogadishu or Xamar or Hamar or Muqdisho or Maqadishu or Juba or Dodoma or Dar es Salaam or Lome or Kampala or Harare or Salisbury or Yerevan or Dhaka or Dacca or Thimphu or Thimbu or Sucre or Charcas or La Plata or Chuquisaca or La Paz or Praia or Yaounde or Jaunde or Brazzaville or Yamoussoukro or Cairo or Accra).ti,ab,id,in,gl. (47191)
- 63 (Tegucigalpa or Tegus or New Delhi or Jakarta or Nairobi or South Tarawa or Tarawa Teinainano or Pristina or Prishtina or Bishkek or Pishpek or Frunze or Vientiane or Maseru or Nouakchott or Palikir or Chisinau or Kishinev or Rabat or Nay Pyi Taw or Naypyidaw or Nepranytau or Naypyitaw or Kyetpyay or Pynmana or Kyatpyay or Pynmana or Yangon or Rangoon or Managua or Abuja or Lagos or Islamabad or Port Moresby or Moresby or Pom Town or Manila or Apia or Dakar or Honiara or Jayawardenepura or Jayawardenepura or Khartoum or Mbabane or Embabane or Lobamba or Damascus or Dushanbe or Dyushambe or Stalinabad or Dili or Kyiv or Kiev or Tashkent or Toshkent or Port Vila or Hanoi or Ha Noi or Sana'a or Sanaa or Sana or Lusaka or Ulaanbaatar or Ulan-Bator or Nuku-Alofa).ti,ab,id,in,gl. (43135)
- 64 62 or 63 (89958)

- 65 (LMIC or LMICs or LAMIC or LAMICs or ((deprived\* or underserved or under-served or transitional or poor or underdevel\* or devel\* or low\* or less or least or under or mid\* or third) adj3 (countr\* or nation or econom\*))).ti,ab,id. (54467)
- 66 61 or 64 or 65 (471660)
- 67 1 and 66 (67)
- 68 remove duplicates from 67 (67)

## 2.9. LILACS

tw:((tw:(trauma)) AND (tw:(register OR registers OR registry OR registries OR database OR databases OR data-base OR data-bases)) AND (instance:"regional")) AND (instance:"regional") AND ( db:("LILACS" OR "IBECS" OR "BDEF" OR "CUMED" OR "MedCarib"))

## 2.10. ProQuest Dissertations & Theses Global

ti(trauma-regist\* or trauma-database\* or trauma-data-base\*) OR ab(trauma-regist\* or trauma-database\* or trauma-data-base\*)

## 2.11. Scopus

| ID  | SEARCH                                                                                                                                                                                                                                                                                                                                                                                                                                                                        | HITS    |
|-----|-------------------------------------------------------------------------------------------------------------------------------------------------------------------------------------------------------------------------------------------------------------------------------------------------------------------------------------------------------------------------------------------------------------------------------------------------------------------------------|---------|
| #1  | TITLE-ABS-KEY(trauma W/2 (database* OR data-base* OR regist*))                                                                                                                                                                                                                                                                                                                                                                                                                | 4,291   |
| #2  | TITLE-ABS-KEY(east* AND africa OR burundi OR djibouti OR somaliland OR eritrea OR ethiopia OR abyssinia OR kenya OR rwanda OR ruanda OR somalia OR sudan OR tanzania OR tanganyika OR zanzibar OR urundi OR uganda OR (somali* W/1 (democratic OR republic)))                                                                                                                                                                                                                 | 66,274  |
| #3  | TITLE-ABS-KEY(west*-africa OR benin OR dahomey OR burkina AND faso OR upper AND volta OR cape AND verde OR cabo AND verde OR cap-vert OR cote AND d'ivoire OR ivory AND coast OR cote AND diivoire OR gambia OR ghana OR gold AND coast OR guinea OR liberia OR mali OR mauritania OR mauretania OR niger OR nigeria OR senegal OR senegambia OR sierra AND leone OR togo OR togolese OR togoland OR (sudan* W/1 republic))                                                   | 9       |
| #4  | TITLE-ABS-KEY(afghanistan OR armenia* OR bangladesh OR east-bengal OR bhutan OR boliv* OR cambodia OR kampuchea* OR khmer OR kampudja OR cameroun OR cameroon OR "ubangi-shari" OR centrafrique)                                                                                                                                                                                                                                                                              | 95,203  |
| #5  | TITLE-ABS-KEY((centrafrican OR central-african)W/2 (republic OR empire))                                                                                                                                                                                                                                                                                                                                                                                                      | 3,239   |
| #6  | TITLE-ABS-KEY(central-africa* W/2 (republic OR empire))                                                                                                                                                                                                                                                                                                                                                                                                                       | 447     |
| #7  | TITLE-ABS-KEY(chad OR tchad OR tshad OR comoros OR comores OR comoro OR mayotte OR katanga OR zaire OR congo OR leopoldville OR egypt OR "united arab republic" OR salvador OR guatemala OR haiti OR hispaniola OR honduras OR india OR sikkim OR indonesia* OR celebes OR east AND indies OR irian AND jaya OR java OR madoera OR madura OR malay AND archipelago OR "Netherlands East Indies" OR new AND guinea AND west OR sulawesi OR sumatra OR timor OR west AND irian) | 66      |
| #7  | TITLE-ABS-KEY(kashmir OR kiribati OR nauru OR tuvalu OR north*-korea OR (korea W/5 demo*) OR kosovo OR kirghiz* OR kirgiz* OR kyrgyz* OR laos OR lao AND pdr OR (lao AND democratic-republic) OR lesotho OR basutoland OR madagascar OR malagasy OR malawi OR nyasaland OR micronesia*)                                                                                                                                                                                       | 1,933   |
| #8  | TITLE-ABS-KEY(moldova* OR moldavia* OR mongolia* OR morocco OR ifni OR mozambique OR mocambique OR mozambic OR myanmar OR burma OR nepal OR nicaragua OR pakistan OR papua OR philippines OR philipines OR phillippines OR phillippines OR mindanao OR luzon OR visayas)                                                                                                                                                                                                      | 189,391 |
| #9  | TITLE-ABS-KEY(samoa* OR sao AND tome OR (caroline OR ellice OR gilbert OR johnston OR mariana OR marshall OR pacific OR solomon)W/1 (island OR islands) OR ceylon OR sri AND lanka OR swaziland OR syria* OR tajikistan OR tadjik* OR tadhik* OR tajik OR timor AND leste OR east AND timor OR portuguese-timor OR tonga* OR tunisia OR tunis)                                                                                                                                | 7       |
| #10 | TITLE-ABS-KEY(ukrain* OR uzbek* OR vanuatu OR new AND hebrides OR vietnam OR viet-nam OR west AND bank OR gaza OR palestin* OR yemen* OR aden OR                                                                                                                                                                                                                                                                                                                              | 1,886   |

|     |                                                                                                                                                                                                                                                                                                                                                                                                                                                                                                                                                                                                                                                                                                                                                                                                                                                                                                                                                                                                                                                                                                                                                                                                                                                                                                                                                                                                                                                                                                                                                                                                                                                           |         |
|-----|-----------------------------------------------------------------------------------------------------------------------------------------------------------------------------------------------------------------------------------------------------------------------------------------------------------------------------------------------------------------------------------------------------------------------------------------------------------------------------------------------------------------------------------------------------------------------------------------------------------------------------------------------------------------------------------------------------------------------------------------------------------------------------------------------------------------------------------------------------------------------------------------------------------------------------------------------------------------------------------------------------------------------------------------------------------------------------------------------------------------------------------------------------------------------------------------------------------------------------------------------------------------------------------------------------------------------------------------------------------------------------------------------------------------------------------------------------------------------------------------------------------------------------------------------------------------------------------------------------------------------------------------------------------|---------|
|     | sanaa OR yugoslavia OR vojvodina OR zambia OR zimbabwe OR rhodesia)                                                                                                                                                                                                                                                                                                                                                                                                                                                                                                                                                                                                                                                                                                                                                                                                                                                                                                                                                                                                                                                                                                                                                                                                                                                                                                                                                                                                                                                                                                                                                                                       |         |
| #11 | #2 OR #3 OR #4 OR #5 OR #6 OR #7 OR #8 OR #9 OR #10                                                                                                                                                                                                                                                                                                                                                                                                                                                                                                                                                                                                                                                                                                                                                                                                                                                                                                                                                                                                                                                                                                                                                                                                                                                                                                                                                                                                                                                                                                                                                                                                       | 342,829 |
| #12 | TITLE-ABS-KEY(kabul OR porto-novo OR hogbonou OR adjace OR cotonou OR kutonu OR ouagadougou OR ouaga OR bujumbura OR usumbura OR phnom-penh OR bangui OR bangi OR n'djamena OR ndjamena OR fort-lamy OR moroni OR kinshasa OR asmara OR asmera OR addis-ababa OR addis-abeba OR banjul OR bathurst OR conakry OR bissau OR port-au-prince OR pyongyang OR monrovia OR antananarivo OR tananarive OR tana OR lilongwe OR bamako OR maputo OR lourenco-marques OR kathmandu OR niamey OR kigali OR freetown OR free-town OR mogadishu OR xamar OR hamar OR muqdisho OR maqadishu OR juba OR dodoma OR dar-es-salaam OR lome OR kampala OR harare OR salisbury OR yerevan OR dhaka OR dacca OR thimphu OR thimbu OR sucre OR charcas OR la-plata OR chuquisaca OR la-paz OR praia OR yaounde OR jaunde OR brazzaville OR yamoussoukro OR cairo OR accra OR tegucigalpa OR tegus OR new-delhi OR jakarta OR nairobi OR south-tarawa OR tarawa-teinainano OR pristina OR prishtina OR bishkek OR pishpek OR frunze OR vientiane OR maseru OR nouakchott OR palikir OR chisinau OR kishinev OR rabat OR nay-pyi-taw OR naypyidaw OR nepranytau OR naypyitaw OR kyetpyay OR pyinmana OR kyatpyay OR pyinmana OR yangon OR rangoon OR managua OR abuja OR lagos OR islamabad OR port-moresby OR moresby OR pom-town OR manila OR apia OR dakar OR honiara OR jayawardenepura OR jayewardenepura OR khartoum OR mbabane OR embabane OR lobamba OR damascus OR dushanbe OR dyushambe OR stalinabad OR dili OR kyiv OR kiev OR tashkent OR toshkent OR port-vila OR hanoi OR ha-noi OR sana'a OR sanaa OR sana OR lusaka OR ulaanbaatar OR ulan-bator OR nuku-alofa) | 95,498  |
| #13 | TITLE-ABS-KEY(lmic OR lmics OR lamic OR lamics)                                                                                                                                                                                                                                                                                                                                                                                                                                                                                                                                                                                                                                                                                                                                                                                                                                                                                                                                                                                                                                                                                                                                                                                                                                                                                                                                                                                                                                                                                                                                                                                                           | 1,892   |
| #14 | TITLE-ABS-KEY((deprived* OR underserved OR under-served OR transitional OR poor OR underdevel* OR devel* OR low* OR less OR least OR under OR mid* OR third)W/3 (countr* OR nation OR econom*))                                                                                                                                                                                                                                                                                                                                                                                                                                                                                                                                                                                                                                                                                                                                                                                                                                                                                                                                                                                                                                                                                                                                                                                                                                                                                                                                                                                                                                                           | 515,284 |
| #15 | #11 OR #12 OR #13 OR #14                                                                                                                                                                                                                                                                                                                                                                                                                                                                                                                                                                                                                                                                                                                                                                                                                                                                                                                                                                                                                                                                                                                                                                                                                                                                                                                                                                                                                                                                                                                                                                                                                                  | 889,779 |
| #16 | #1 AND #16                                                                                                                                                                                                                                                                                                                                                                                                                                                                                                                                                                                                                                                                                                                                                                                                                                                                                                                                                                                                                                                                                                                                                                                                                                                                                                                                                                                                                                                                                                                                                                                                                                                | 272     |



## 2.12. Web of Science

| ID   | SEARCH                                                                                                                                                                                                                                                                                                                                                                                                                                                                                                                                                                                                                                                                                                                                                                                                                                      | HITS      |
|------|---------------------------------------------------------------------------------------------------------------------------------------------------------------------------------------------------------------------------------------------------------------------------------------------------------------------------------------------------------------------------------------------------------------------------------------------------------------------------------------------------------------------------------------------------------------------------------------------------------------------------------------------------------------------------------------------------------------------------------------------------------------------------------------------------------------------------------------------|-----------|
| # 15 | #14 AND #1                                                                                                                                                                                                                                                                                                                                                                                                                                                                                                                                                                                                                                                                                                                                                                                                                                  | 251       |
| # 14 | #13 OR #12 OR #8                                                                                                                                                                                                                                                                                                                                                                                                                                                                                                                                                                                                                                                                                                                                                                                                                            | 1,303,954 |
| # 13 | TS=(LMIC or LMICs or LAMIC or LAMICs or ((deprived* or underserved or under-served or transitional or poor or underdevel* or devel* or low* or less or least or under or mid* or third) NEAR/3 (countr* or nation or econom*)))                                                                                                                                                                                                                                                                                                                                                                                                                                                                                                                                                                                                             | 279,365   |
| # 12 | #11 OR #10                                                                                                                                                                                                                                                                                                                                                                                                                                                                                                                                                                                                                                                                                                                                                                                                                                  | 63,622    |
| # 11 | TS=(Tegucigalpa or Tegus or New-Delhi or Jakarta or Nairobi or South-Tarawa or Tarawa-Teinainano or Pristina or Prishtina or Bishkek or Pishpek or Frunze or Vientiane or Maseru or Nouakchott or Palikir or Chisinau or Kishinev or Rabat or Nay-Pyi-Taw or Naypyidaw or Nepranytau or Naypyitaw or Kyetpyay or Pyinmana or Kyatpyay or Pyinmana or Yangon or Rangoon or Managua or Abuja or Lagos or Islamabad or Port-Moresby or Moresby or Pom-Town or Manila or Apia or Dakar or Honiara or Jayawardenepura or Jayawardenepura or Khartoum or Mbabane or Embabane or Lobamba or Damascus or Dushanbe or Dyushambe or Stalinabad or Dili or Kyiv or Kiev or Tashkent or Toshkent or Port-Vila or Hanoi or Ha-Noi or Sana'a or Sanaa or Sana or Lusaka or Ulaanbaatar or Ulan-Bator or Nuku-Alofa)                                       | 29,417    |
| # 10 | TS=(kabul or Porto-Novo or Hogbonou or Adjace or Cotonou or Kutonu or Ouagadougou or Ouaga or Bujumbura or Usumbura or Phnom-Penh or Bangui or Bangi or N'Djamena or Ndjamena or Fort-Lamy or Moroni or Kinshasa or Asmara or Asmera or Addis-Ababa or Addis-Abeba or Banjul or Bathurst or Conakry or Bissau or Port-au-Prince or Pyongyang or Monrovia or Antananarivo or Tananarive or Tana or Lilongwe or Bamako or Maputo or Lourenco-Marques or Kathmandu or Niamey or Kigali or Freetown or Free-town or Mogadishu or Xamar or Hamar or Muqdisho or Maqadishu or Juba or Dodoma or Dar-es-Salaam or Lome or Kampala or Harare or Salisbury or Yerevan or Dhaka or Dacca or Thimphu or Thimbu or Sucre or Charcas or La-Plata or Chuquisaca or La-Paz or Praia or Yaounde or Jaunde or Brazzaville or Yamoussoukro or Cairo or Accra) | 34,712    |
| # 9  | CI=(kabul or Porto-Novo or Hogbonou or Adjace or Cotonou or Kutonu or Ouagadougou or Ouaga or Bujumbura or Usumbura or Phnom-Penh or Bangui or Bangi or N'Djamena or Ndjamena or Fort-Lamy or Moroni or Kinshasa or Asmara or Asmera or Addis-Ababa or Addis-Abeba or Banjul or Bathurst or Conakry or Bissau or Port-au-Prince or Pyongyang or Monrovia or Antananarivo or Tananarive or Tana or Lilongwe or Bamako or Maputo or Lourenco-Marques or Kathmandu or Niamey or Kigali or Freetown or Free-town or Mogadishu or                                                                                                                                                                                                                                                                                                                | 265,806   |

|     |                                                                                                                                                                                                                                                                                                                                                                                                                                                                                                                                                                                                                                                                                                                                                                                                     |           |
|-----|-----------------------------------------------------------------------------------------------------------------------------------------------------------------------------------------------------------------------------------------------------------------------------------------------------------------------------------------------------------------------------------------------------------------------------------------------------------------------------------------------------------------------------------------------------------------------------------------------------------------------------------------------------------------------------------------------------------------------------------------------------------------------------------------------------|-----------|
|     | Xamar or Hamar or Muqdisho or Maqadishu or Juba or Dodoma or Dar-es-Salaam or Lome or Kampala or Harare or Salisbury or Yerevan or Dhaka or Dacca or Thimphu or Thimbu or Sucre or Charcas or La-Plata or Chuquisaca or La-Paz or Praia or Yaounde or Jaunde or Brazzaville or Yamoussoukro or Cairo or Accra)                                                                                                                                                                                                                                                                                                                                                                                                                                                                                      |           |
| # 8 | #7 OR #6 OR #5 OR #4 OR #3 OR #2                                                                                                                                                                                                                                                                                                                                                                                                                                                                                                                                                                                                                                                                                                                                                                    | 1,049,715 |
| # 7 | TS=(ukrain* or uzbek* or vanuatu or new-hebrides or vietnam or viet-nam or west-bank or gaza or palestin* or yemen* or aden or sanaa or Yugoslavia or vojvodina or zambia or zimbabwe or rhodesia)                                                                                                                                                                                                                                                                                                                                                                                                                                                                                                                                                                                                  | 105,676   |
| # 6 | TS=(samoa* or Sao-Tome or ((Caroline or Ellice or Gilbert or Johnston or Mariana or Marshall or Pacific or Solomon) NEAR/1 (Island or islands)) or ceylon or sri lanka or swaziland or syria* or Tajikistan or Tadjik* or Tadzihik* or Tajik or Timor Leste or East Timor or Portuguese-Timor or tonga* or Tunisia or Tunis)                                                                                                                                                                                                                                                                                                                                                                                                                                                                        | 66,298    |
| # 5 | TS=(moldova* or Moldavia* or mongolia* or morocco or ifni or mozambique or Mocambique or mozambic or myanmar or burma or Nepal or nicaragua or Pakistan or Papua or Philippines or Philipines or Phillipines or Phillipines or Mindanao or Luzon or Visayas)                                                                                                                                                                                                                                                                                                                                                                                                                                                                                                                                        | 137,752   |
| # 4 | TS=(Kashmir or kiribati or nauru or tuvalu or North*-Korea (Korea NEAR/5 demo*) or kosovo or Kirghiz* or Kirgiz* or Kyrgyz* or laos or lao pdr or (lao and democratic-republic) or lesotho or Basutoland or madagascar or malagasy or malawi or nyasaland or micronesia*)                                                                                                                                                                                                                                                                                                                                                                                                                                                                                                                           | 44,106    |
| # 3 | TS=(chad or tchad or tshad or comoros or comores or comoro or mayotte or katanga or zaire or congo or leopoldville or egypt or "united arab republic" or salvador or Guatemala or haiti or hispaniola or honduras or india or Sikkim or indonesia* or Celebes or East Indies or Irian Jaya or Java or Madoera or Madura or Malay-Archipelago or "Netherlands East Indies" or New-Guinea West or Sulawesi or Sumatra or Timor or West-Irian)                                                                                                                                                                                                                                                                                                                                                         | 346,780   |
| # 2 | TS=(Afghanistan OR East*-Africa or Burundi or Djibouti or Somaliland or Eritrea or Ethiopia or Abyssinia or Kenya or Rwanda or Ruanda or Somalia or Sudan or Tanzania or Tanganyika or Zanzibar or Urundi or Uganda OR (Somali* NEAR/1 (democratic or republic)) OR West*-Africa or Benin or Dahomey or Burkina Faso or Upper Volta or Cape verde or Cabo Verde or cap-vert or cote d'ivoire or ivory coast or Cote dilvoire or Gambia or Ghana or Gold Coast or Guinea or Liberia or Mali or Mauritania or Mauretania or Niger or Nigeria or Senegal or Senegambia or Sierra Leone or Togo or Togolese or Togoland or (sudan* NEAR/1 republic) OR armenia* OR Bangladesh or East-bengal OR Bhutan OR boliv* OR cambodia or Kampuchea* or Khmer or kampudja OR cameroun or cameroon OR ubangi-shari | 444,719   |

|     |                                                                                                        |       |
|-----|--------------------------------------------------------------------------------------------------------|-------|
|     | or Centrafrique or ((central-africa* or centrafrican or central-african) NEAR/2 (republic or empire))) |       |
| # 1 | TS=(trauma NEAR/2 (database* or data-base* or regist*))                                                | 3,582 |
