# Supplementary material for: Strategies for successful trauma registry implementation in low- and middle-income countries—protocol for a systematic review
Source: Syst Rev. 2018 Feb 21;7:33. doi: 10.1186/s13643-018-0700-2 (PMC5822522; doi:10.1186/s13643-018-0700-2)
Supplement: Supplementary file 2 — Data Extraction Sheet. Template that will be used to extract data from included articles in systematic review. (PDF 51 kb) [file 13643_2018_700_MOESM2_ESM.pdf]

**Additional File 2. Data extraction sheet**

Study #: \_\_\_\_\_

Title: \_\_\_\_\_

ID/DOI/URL: \_\_\_\_\_

|                                                      |  |
|------------------------------------------------------|--|
| Low- and middle-income country authorship (yes/no)   |  |
| LMIC authorship (position)                           |  |
| Open access                                          |  |
| Study type                                           |  |
| Country of study                                     |  |
| World bank classification                            |  |
| Number of patients                                   |  |
| Trauma centre designation                            |  |
| Registry inclusion criteria                          |  |
| Registry exclusion criteria                          |  |
| Registry funding                                     |  |
| Source of funding                                    |  |
| High-income country partnership                      |  |
| Registry modality                                    |  |
| Software used                                        |  |
| Platform compatibility                               |  |
| Per-patient completion time                          |  |
| Dedicated staff registry (yes/no)                    |  |
| Data collectors                                      |  |
| Specialized training / data-collection certification |  |
| Timing of data collection                            |  |
| Vital signs                                          |  |
| Anatomical injury data                               |  |
| Injury coding                                        |  |
| Severity of injury score (yes/no)                    |  |
| Which score used?                                    |  |
| Patient demographics                                 |  |
| Procedures recorded?                                 |  |
| Complications recorded?                              |  |
| Follow-up data?                                      |  |
| Type of follow-up data?                              |  |
| Duration of follow-up?                               |  |
| Data quality control?                                |  |
| Challenges and barriers                              |  |
| Successes and recommendations                        |  |
| Comments                                             |  |
